# Supplementary material for: Finding Meaning in Hell. The Role of Meaning, Religiosity and Spirituality in Posttraumatic Growth During the Coronavirus Crisis in Spain
Source: Front Psychol. 2020 Nov 5;11:567836. doi: 10.3389/fpsyg.2020.567836 (PMC7674589; doi:10.3389/fpsyg.2020.567836)
Supplement: Supplementary file 4 [file Table_4.DOCX]

| **Supplementary Table 4.** Pearson Correlations. Meaning, Growth, Spirituality and Religiosity | | | | | | | | | |
| --- | --- | --- | --- | --- | --- | --- | --- | --- | --- |
|  | | 1 | 2 | 3 | 4 | 5 | 6 | 7 | 8 |
| 1. Total meaning |  | 1 |  |  |  |  |  |  |  |
| 1. SSL |  | .962** |  |  |  |  |  |  |  |
| 1. GPL |  | .892** | .735** |  |  |  |  |  |  |
| 1. Total growth |  | .266** | .220** | .295** |  |  |  |  |  |
| 1. Personal growth |  | .190** | .157** | .216** | .874** |  |  |  |  |
| 1. Interpersonal growth |  | .247** | .202** | .274** | .916** | .725** |  |  |  |
| 1. Social growth |  | .270** | .224** | .293** | .858** | .579** | .701** |  |  |
| 1. Spirituality |  | .305** | .277** | .296** | .226** | .205** | .193** | .200** |  |
| 1. Religiosity |  | .259** | .242** | .244** | .224** | .178** | .186** | .230** | .629** |
